# Supplementary material for: Combination Breeding and Marker-Assisted Selection to Develop Late Blight Resistant Potato Cultivars
Source: Preprints.org preprint supplement (doi:10.20944/preprints202110.0209.v1), 2021-10-14
Supplement: Supplementary file 1 [file supplementary]

**Supplement 1 Table S1.** SCAR markers of *Rpi*-genes in F1 progeny and parental lines

| **Genotypes** | ***Genes* /SCAR markers** | | | | | | | | | |
| --- | --- | --- | --- | --- | --- | --- | --- | --- | --- | --- |
| ***R1*** | ***R2=Rpi-blb3*** | | | ***R3a*** | ***R3b*** | ***Rpi-blb 1 = Rpi-sto1*** | | | ***Rpi-vnt1.3*** |
| **R1-1205** | **R2-1137** | **R2-686** | **Rpi-blb3-305** | **R3a-1380** | **R3b-378** | **RB-226** | **Blb-821** | **Rpi-sto1-890** | **Rpi-vnt1.3-616** |
| 13/11-09 | 0 | 0 | 0 | 0 | 0 | 1 | 1 | 1 | 1 | 1 |
| Сударыня | 0 | 1 | 1 | 0 | 1 | 1 | 1 | 1 | 1 | 0 |
| 952-1 | 0 | 0 | 0 | 0 | 0 | 0 | 0 | 0 | 0 | 0 |
| 952-2 | 0 | 0 | 0 | 0 | 1 | 1 | 1 | 1 | 1 | 0 |
| 952-3 | 0 | 0 | 0 | 0 | 0 | 1 | 1 | 1 | 1 | 0 |
| 952-4 | 0 | 0 | 0 | 0 | 1 | 1 | 1 | 1 | 1 | 0 |
| 952-5 | 0 | 0 | 0 | 0 | 0 | 1 | 1 | 1 | 1 | 1 |
| 952-6 | 0 | 0 | 1 | 0 | 0 | 1 | 0 | 0 | 0 | 0 |
| 952-7 | 0 | 0 | 0 | 0 | 0 | 1 | 0 | 0 | 0 | 1 |
| 952-8 | 0 | 0 | 1 | 0 | 0 | 1 | 1 | 1 | 1 | 1 |
| 952-9 | 0 | 0 | 0 | 0 | 1 | 1 | 1 | 1 | 1 | 0 |
| 952-10 | 0 | 0 | 0 | 0 | 0 | 1 | 1 | 0 | 0 | 0 |
| 952-12 | 0 | 0 | 0 | 0 | 0 | 1 | 1 | 1 | 1 | 0 |
| 952-13 | 0 | 0 | 0 | 0 | 0 | 0 | 0 | 0 | 0 | 0 |
| 952-14 | 0 | 0 | 0 | 0 | 0 | 1 | 0 | 0 | 0 | 1 |
| 925-15 | 0 | 0 | 0 | 0 | 0 | 1 | 0 | 0 | 0 | 0 |
| **G**enotypes | ***Genes* /SCAR markers** | | | | | | | | | |
| ***R1*** | ***R2=Rpi-blb3*** | | | ***R3a*** | ***R3b*** | ***Rpi-blb 1 = Rpi-sto1*** | | | ***Rpi-vnt1.3*** |
| **R1-1205** | **R2-1137** | **R2-686** | **Rpi-blb3-305** | **R3a-1380** | **R3b-378** | **RB-226** | **Blb-821** | **Rpi-sto1-890** | **Rpi-vnt1.3-616** |
| 952-16 | 0 | 0 | 0 | 0 | 0 | 1 | 1 | 1 | 1 | 0 |
| 952-17 | 0 | 0 | 1 | 0 | 0 | 0 | 1 | 0 | 0 | 1 |
| 952-18 | 0 | 0 | 0 | 0 | 0 | 0 | 0 | 0 | 0 | 0 |
| 952-19 | 0 | 1 | 1 | 0 | 1 | 1 | 1 | 1 | 1 | 0 |
| 952-20 | 0 | 0 | 0 | 0 | 0 | 0 | 1 | 1 | 1 | 1 |
| 952-21 | 0 | 0 | 1 | 0 | 1 | 1 | 1 | 1 | 1 | 0 |
| 952-22 | 0 | 0 | 0 | 0 | 0 | 1 | 1 | 1 | 1 | 0 |
| 952-23 | 0 | 0 | 0 | 0 | 1 | 1 | 1 | 1 | 1 | 0 |
| 952-24 | 0 | 0 | 0 | 0 | 1 | 1 | 1 | 1 | 1 | 0 |
| 952-25 | 0 | 0 | 0 | 0 | 0 | 1 | 0 | 0 | 0 | 1 |
| 952-26 | 0 | 1 | 1 | 0 | 0 | 1 | 1 | 1 | 1 | 1 |
| 952-27 | 0 | 0 | 0 | 0 | 0 | 0 | 1 | 1 | 1 | 0 |
| 952-28 | 0 | 0 | 1 | 0 | 0 | 0 | 0 | 0 | 0 | 0 |
| 952-29 | 0 | 0 | 1 | 0 | 0 | 1 | 1 | 1 | 1 | 0 |
| 952-30 | 0 | 0 | 0 | 0 | 1 | 1 | 1 | 1 | 1 | 0 |
| 952-31 | 0 | 0 | 0 | 0 | 1 | 1 | 1 | 1 | 1 | 0 |
| 952-32 | 0 | 0 | 0 | 0 | 0 | 1 | 1 | 1 | 1 | 0 |
| **G**enotypes | ***Genes* /SCAR markers** | | | | | | | | | |
| ***R1*** | ***R2=Rpi-blb3*** | | | ***R3a*** | ***R3b*** | ***Rpi-blb 1 = Rpi-sto1*** | | | ***Rpi-vnt1.3*** |
| **R1-1205** | **R2-1137** | **R2-686** | **Rpi-blb3-305** | **R3a-1380** | **R3b-378** | **RB-226** | **Blb-821** | **Rpi-sto1-890** | **Rpi-vnt1.3-616** |
| 952-33 | 0 | 1 | 0 | 0 | 1 | 1 | 1 | 1 | 1 | 0 |
| 952-35 | 0 | 0 | 1 | 0 | 1 | 1 | 1 | 0 | 1 | 1 |
| 952-36 | 0 | 1 | 0 | 0 | 1 | 1 | 1 | 1 | 1 | 0 |
| 952-37 | 0 | 1 | 1 | 0 | 0 | 0 | 1 | 1 | 1 | 0 |
| 952-38 | 0 | 0 | 0 | 0 | 0 | 0 | 1 | 1 | 1 | 0 |
| 952-39 | 0 | 1 | 0 | 0 | 1 | 1 | 0 | 0 | 0 | 0 |
| 952-40 | 0 | 0 | 1 | 0 | 1 | 1 | 0 | 0 | 0 | 0 |
| 952-41 | 0 | 1 | 1 | 0 | 0 | 1 | 1 | 1 | 1 | 0 |
| 952-42 | 0 | 0 | 0 | 0 | 0 | 1 | 1 | 1 | 1 | 0 |
| 952-43 | 0 | 1 | 1 | 0 | 0 | 1 | 1 | 1 | 1 | 0 |
| 952-44 | 0 | 0 | 0 | 0 | 0 | 1 | 1 | 1 | 1 | 0 |
| 952-45 | 0 | 1 | 0 | 0 | 0 | 1 | 1 | 1 | 1 | 0 |
| 952-46 | 0 | 0 | 0 | 0 | 1 | 1 | 0 | 0 | 0 | 0 |
| 952-47 | 0 | 0 | 0 | 0 | 0 | 0 | 1 | 1 | 1 | 0 |
| 952-49 | 0 | 0 | 0 | 0 | 0 | 1 | 0 | 0 | 0 | 1 |
| 952-50 | 0 | 0 | 0 | 0 | 1 | 1 | 0 | 0 | 0 | 0 |
| 952-51 | 0 | 0 | 0 | 0 | 1 | 1 | 0 | 0 | 0 | 0 |
| **G**enotypes | ***Genes* /SCAR markers** | | | | | | | | | |
| ***R1*** | ***R2=Rpi-blb3*** | | | ***R3a*** | ***R3b*** | ***Rpi-blb 1 = Rpi-sto1*** | | | ***Rpi-vnt1.3*** |
| **R1-1205** | **R2-1137** | **R2-686** | **Rpi-blb3-305** | **R3a-1380** | **R3b-378** | **RB-226** | **Blb-821** | **Rpi-sto1-890** | **Rpi-vnt1.3-616** |
| 952-52 | 0 | 1 | 1 | 0 | 1 | 1 | 0 | 0 | 0 | 0 |
| 952-54 | 0 | 0 | 0 | 0 | 1 | 1 | 1 | 1 | 1 | 0 |
| 952-55 | 0 | 0 | 0 | 0 | 0 | 1 | 1 | 0 | 0 | 1 |
| 952-56 | 0 | 0 | 0 | 0 | 0 | 0 | 1 | 1 | 1 | 0 |
| 952-57 | 0 | 1 | 1 | 0 | 1 | 1 | 1 | 1 | 1 | 1 |
| 952-58 | 0 | 1 | 1 | 0 | 0 | 0 | 1 | 1 | 0 | 0 |
| 952-59 | 0 | 0 | 0 | 0 | 1 | 1 | 1 | 1 | 1 | 0 |
| 952-60 | 0 | 0 | 0 | 0 | 0 | 1 | 1 | 1 | 1 | 0 |
| 952-61 | 0 | 0 | 0 | 0 | 1 | 1 | 0 | 1 | 0 | 0 |
| 952-62 | 0 | 0 | 1 | 0 | 1 | 1 | 1 | 1 | 1 | 0 |
| 952-63 | 0 | 0 | 0 | 0 | 1 | 1 | 1 | 1 | 1 | 0 |
| 952-64 | 0 | 1 | 1 | 0 | 0 | 0 | 1 | 1 | 1 | 1 |
| 952-65 | 0 | 1 | 1 | 0 | 1 | 1 | 1 | 1 | 1 | 0 |
| 952-66 | 0 | 0 | 0 | 0 | 1 | 1 | 1 | 1 | 1 | 0 |
| 952-67 | 0 | 1 | 1 | 0 | 0 | 1 | 0 | 0 | 0 | 1 |
| 952-69 | 0 | 0 | 1 | 0 | 0 | 1 | 1 | 1 | 1 | 0 |

**Figure S1.** Alignment of *Rpi-vnt1* homologs and predicted amino acid sequences of Rpi-vnt1 protein homologs

3 102

CP047560_59492023-59491423 (1) TTCCTCATCCTCACATTTAGAAAAAAGAAATTTAAGGAAA-----AAAGAGATGGCTGAAATTCTTCTCACAGCAGTCATCAATAAATCAATAGAAATAG

GU338312_89-700 (3) TTCCTCATCCTCACATTTAGAAAAAAGAAATTTAACGAAAAATTAAAGGA GATGACTGATATTCTTCTTACAGCAGTCATCAATAAATCAATAGAAATAG

Hybrid_13/11 (1) TTCCTCATCCTCACATTTAGAAAAAAGAAATTTAACGAAAAATTAAAGGA GATGACTGATATTCTTCTTACAGCAGTCATCAATAAATCAATAGAAATAG

FJ423044_758-1367 (3) TTCCTCATCCTCACATTTAGAAAAAAGAAATTTAACGAAAAATTAAAGGA GATGGCTGAAATTCTTCTCACAGCAGTCATCAATAAATCAATAGAAATAG

FJ423046_91-700 (1) TTCCTCATCCTCACATTTAGAAAAAAGAAATTTAACGAAAAATTAAAGGA GATGGCTGAAATTCTTCTCACAGCAGTCATCAATAAATCAATAGAAATAG

MH297492_51-660 (1) TTCCTCATCCTCACATTTAGAAAAAAGAAATTTAACGAAAAATTAAAGGA GATGGCTGAAATTCTTCTCACAGCAGTCATCAATAAATCAATAGAAATAG

Consensus (3) TTCCTCATCCTCACATTTAGAAAAAAGAAATTTAACGAAAAATTAAAGGA GATGGCTGAAATTCTTCTCACAGCAGTCATCAATAAATCAATAGAAATAG

103 202

CP047560_59492023-59491423 (96) CTGCAAATCTACTCTTTCAAGAAGGTACGCGTTTATATTGGTTGAAAGAGGAYATAGATTGGCTCCAGAGAGAAATGAGACACATTCGATCATATGTAGA

GU338312_89-700 (103) CTGCAAATCTACTCGTGCAAGAAGGAACGCGTTTATATTGGTTGAAAGAGGACATCAATTGGCTCCAGAGAGAAATGAGACACATTCGATCATATGTAGA

Hybrid_13/11 (101) CTGCAAATCTACTCGTGCAAGAAGGTACGCGTTTATATTGGTTGAAAGAGGACATCAATTGGCTCCAGAGAGAAATGAGACACATTCGATCATATGTAGA

FJ423044_758-1367 (103) CTGGAAATGTACTCTTTCAAGAAGGTACGCGTTTATATTGGTTGAAAGAGGACATCGATTGGCTCCAGAGAGAAATGAGACACATTCGATCATATGTAGA

FJ423046_91-700 (101) CTGGAAATGTACTCTTTCAAGAAGGTACGCGTTTATATTGGTTGAAAGAGGACATCGATTGGCTCCAGAGAGAAATGAGACACATTCGATCATATGTAGA

MH297492_51-660 (101) CTGGAAATGTACTCTTTCAAGAAGGTACGCGTTTATATTGGTTGAAAGAGGACATCGATTGGCTCCAGAGAGAAATGAGACACATTCGATCATATGTAGA

Consensus (103) CTGGAAATGTACTCTTTCAAGAAGGTACGCGTTTATATTGGTTGAAAGAGGACATCGATTGGCTCCAGAGAGAAATGAGACACATTCGATCATATGTAGA

203 302

CP047560_59492023-59491423 (196) CGATGCAAAGGCCAAGGAAGTTGGAGGCGATTCAMGGGTCAAAAACTTAT TAAAAGATATTCAACAACTGGCAGGTGATGTGGAGGATCTATTAGATGAG

GU338312_89-700 (203) CAATGCAAAGGCAAAGGAAGTTGGAGGCGATTCAAGGATCAAAAACTTAT TAAAAGATATTCAACAACTGGCAGGTGATGTGGAGGATCTATTAGATGAC

Hybrid_13/11 (201) CAATGCAAAGGCAAAGGAAGTTGGAGGCGATTCAAGGATCAAAAACTTAT TAAAAGATATTCAACAATTGGCAGGTGATGTGGAGGATCTATTAGATGAG

FJ423044_758-1367 (203) CAATGCAAAGGCAAAGGAAGTTGGAGGCGATTCAAGGGTGAAAAACTTAT TAAAAGATATTCAACAACTGGCAGGTGATGTGGAGGATCTATTAGATGAG

FJ423046_91-700 (201) CAATGCAAAGGCAAAGGAAGTTGGAGGCGATTCAAGGGTGAAAAACTTAT TAAAAGATATTCAACAACTGGCAGGTGATGTGGAGGATCTATTAGATGAG

MH297492_51-660 (201) CAATGCAAAGGCAAAGGAAGTTGGAGGCGATTCAAGGGTGAAAAACTTAT TAAAAGATATTCAACAACTGGCAGGTGATGTGGAGGATCTATTAGATGAG

Consensus (203) CAATGCAAAGGCAAAGGAAGTTGGAGGCGATTCAAGGGTGAAAAACTTAT TAAAAGATATTCAACAACTGGCAGGTGATGTGGAGGATCTATTAGATGAG

303 402

CP047560_59492023-59491423 (296) TTTCTTCCAAAAATTCAACAATCCAATAAGTTCATTTGTTGCCTTAAGAC GGTTTCTTTTGCCGATGAGTTTGCTATGGAGATTGAGAAGATAAAAAGAA

GU338312_89-700 (303) TTCCTTCCAAAAATTCAACAATCCAATAAGTTCATTTGTTGCCTTAAGAC GGTTTCTTTTGCCGATGAGTTTGCTATGGAGATTGAGAAGATAAAAAGAA

Hybrid_13/11 (301) TTTCTTCCAAAAATTCAACAATCCAATAAGTTCATTTGTTGCCTTAAGAC GGTTTCTTTTGCCGATGAGTTTGCTATGGAGATTGAGAAGATAAAAAGAA

FJ423044_758-1367 (303) TTTCTTCCAAAAATTCAACAATCCAATAAGTTCATTTGTTGCCTTAAGAC GGTTTCTTTTGCCGATGAGTTTGCTATGGAGATTGAGAAGATAAAAAGAA

FJ423046_91-700 (301) TTTCTTCCAAAAATTCAACAATCCAATAAGTTCATTTGTTGCCTTAAGAC GGTTTCTTTTGCCGATGAGTTTGCTATGGAGATTGAGAAGATAAAAAGAA

MH297492_51-660 (301) TTTCTTCCAAAAATTCAACAATCCAATAAGTTCATTTGTTGCCTTAAGAC GGTTTCTTTTGCCGATGAGTTTGCTATGGAGATTGAGAAGATAAAAAGAA

Consensus (303) TTTCTTCCAAAAATTCAACAATCCAATAAGTTCATTTGTTGCCTTAAGAC GGTTTCTTTTGCCGATGAGTTTGCTATGGAGATTGAGAAGATAAAAAGAA

403 502

CP047560_59492023-59491423 (396) GAGTTGCTGACATTGACCGTGTAAGGACAACTTACAAYATCATAGATACAAGTAACAACAATAGTGATGATTGCATTCCATTGGACCAGAGAAGATTRTT

GU338312_89-700 (403) GAGTTGCTGATATTGACCGTGTAAGGACAACTTACAACATCACAGATACAAGTAACAATAAT---GATGATTGTATTCCATTGGACCGGAGAAGATTGTT

Hybrid_13/11 (401) GAGTTGCTGATATTGACCGTGTAAGGACAACTTACAACATCACAGATACAAGTAACAATAAT---GATGATTGCATTCCATTGGACCGGAGAAGATTGTT

FJ423044_758-1367 (403) GAGTTGCTGATATTGACCGTGTAAGGACAACTTACAGCATCACAGATACAAGTAACAATAAT---GATGATTGCATTCCATTGGACCGGAGAAGATTGTT

FJ423046_91-700 (401) GAGTTGCTGATATTGACCGTGTAAGGACAACTTACAGCATCACAGATACAAGTAACAATAAT---GATGATTGCATTCCATTGGACCGGAGAAGATTGTT

MH297492_51-660 (401) GAGTTGCTGATATTGACCGTGTAAGGACAACTTACAGCATCACAGATACAAGTAACAATAAT---GATGATTGCATTCCATTGGACCGGAGAAGATTGTT

Consensus (403) GAGTTGCTGATATTGACCGTGTAAGGACAACTTACAGCATCACAGATACAAGTAACAATAAT GATGATTGCATTCCATTGGACCGGAGAAGATTGTT

503 601

CP047560_59492023-59491423 (496) CCTTCATGCTGATGAAAYAGAGGTCATCGGTYTGGAWGAYGACTTCAATA AGCTSCAAGCCAAATTACTTGATCAWGATTTGCCTTATGGAGTTGTTTC

GU338312_89-700 (500) CCTTCATGCTGATGAAACAGAGGTTATCGGTCTGGATGATGACTTCAATA TACTACAAGCCAAATTACTTGATCAAGATTTGCCTTATGGAGTTGTTTC

Hybrid_13/11 (498) CCTTCATGCTGATGAAACAGAGGTTATCGGTCTGGATGATGACTTCAATA TACTACAAGCCAAATTACTTGATCAAGATTTGCCTTATGGAGTTGTTTC

FJ423044_758-1367 (500) CCTTCATGCTGATGAAACAGAGGTCATCGGTCTGGAAGATGACTTCAATA CACTACAAGCCAAATTACTTGATCATGATTTGCCTTATGGAGTTGTTTC

FJ423046_91-700 (498) CCTTCATGCTGATGAAACAGAGGTCATCGGTCTGGAAGATGACTTCAATA CACTACAAGCCAAATTACTTGATCATGATTTGCCTTATGGAGTTGTTTC

MH297492_51-660 (498) CCTTCATGCTGATGAAACAGAGGTCATCGGTCTGGAAGATGACTTCAATA CACTACAAGCCAAATTACTTGATCATGATTTGCCTTATGGAGTTGTTTC

Consensus (503) CCTTCATGCTGATGAAACAGAGGTCATCGGTCTGGAAGATGACTTCAATA CACTACAAGCCAAATTACTTGATCATGATTTGCCTTATGGAGTTGTTTC

Supplemental Fig. 1A. Alignment of *Rpi-vnt1* homologs. Hybrid 13/11, amplicon sequence from clone 13/11-09; FJ423044, *S. venturii* *Rpi-vnt1.1* gene; FJ423046, *S. venturii* *Rpi-vnt1.3* gene; MH297492. *S. tuberosum* cv. Alouette *Rpi-vnt1.3* gene; GU338312, *S. microdontum* ssp. *gigantophyllum* isolate GIG362-4 rpi-vnt1-like protein pseudogene; CP047560_59492023-59491423, *S. pinnatisectum* cv. CGN17745 fragment from chromosome 9.

10 109

ACJ66594_17-219 (10) KFNEKLKEMAEILLTAVINKSIEIAGNVLFQEGTRLYWLKEDIDWLQREMRHIRSYVDNAKAKEVGGDSRVKNLLKDIQQLAGDVEDLLDEFLPKIQQSN

ACJ66596_31-233 (10) KFNEKLKEMAEILLTAVINKSIEIAGNVLFQEGTRLYWLKEDIDWLQREMRHIRSYVDNAKAKEVGGDSRVKNLLKDIQQLAGDVEDLLDEFLPKIQQSN

Hybrid (10) KFNEKLKEMTDILLTAVINKSIEIAANLLVQEGTRLYWLKEDINWLQREMRHIRSYVDNAKAKEVGGDSRIKNLLKDIQQLAGDVEDLLDEFLPKIQQSN

S.pin (2) KRNLRKKEMAEILLTAVINKSIEIAANLLFQEGTRLYWLKEDIDWLQREMRHIRSYVDDAKAKEVGGDSRVKNLLKDIQQLAGDVEDLLDEFLPKIQQSN

QAY29223_17-219 (10) KFNEKLKEMAEILLTAVINKSIEIAGNVLFQEGTRLYWLKEDIDWLQREMRHIRSYVDNAKAKEVGGDSRVKNLLKDIQQLAGDVEDLLDEFLPKIQQSN

Consensus (10) KFNEKLKEMAEILLTAVINKSIEIAGNVLFQEGTRLYWLKEDIDWLQREMRHIRSYVDNAKAKEVGGDSRVKNLLKDIQQLAGDVEDLLDEFLPKIQQSN

110 204

ACJ66594_17-219 (110) KFICCLKTVSFADEFAMEIEKIKRRVADIDRVRTTYSITDTSNNN-DDCIPLDRRRLFLHADETEVIGLEDDFNTLQAKLLDHDLPYGVVSIVGM

ACJ66596_31-233 (110) KFICCLKTVSFADEFAMEIEKIKRRVADIDRVRTTYSITDTSNNN-DDCIPLDRRRLFLHADETEVIGLEDDFNTLQAKLLDHDLPYGVVSIVGM

Hybrid (110) KFICCLKTVSFADEFAMEIEKIKRRVADIDRVRTTYNITDTSNNN-DDCIPLDRRRLFLHADETEVIGLDDDFNILQAKLLDQDLPYGVVSIVGM

S.pin (102) KFICCLKTVSFADEFAMEIEKIKRRVADIDRVRTTYNIIDTSNNNSDDCIPLDQRRLFLHADEXEVIGLXDDFNKLQAKLLDXDLPYGVVSIVGM

QAY29223_17-219 (110) KFICCLKTVSFADEFAMEIEKIKRRVADIDRVRTTYSITDTSNNN-DDCIPLDRRRLFLHADETEVIGLEDDFNTLQAKLLDHDLPYGVVSIVGM

Consensus (110) KFICCLKTVSFADEFAMEIEKIKRRVADIDRVRTTYSITDTSNNN DDCIPLDRRRLFLHADETEVIGLEDDFNTLQAKLLDHDLPYGVVSIVGM

Supplemental Fig. S1B. Alignment of predicted amino acid sequences of Rpi-vnt1 protein homologs. Hybrid 13/11; sequence corresponding to the amplicon from clone 13/11-09; ACJ66594, protein Rpi-vnt1.1 from *S. venturii*; ACJ66596, protein Rpi-vnt1.3 from *S. venturii*); QAY29223, protein Rpi-vnt1.3 from *S. tuberosum* cv. Alouette; S.pin, predicted amino acid sequence of the *S. pinnatisectum* cv. CGN177459 chromosome 9 fragment (59492023 to 59491423 bp).
